# Supplementary material for: Deep learning-based estimation of rice yield using RGB image
Source: Research Square preprint supplement (doi:10.21203/rs.3.rs-1026695/v1), 2021-10-29
Supplement: Supplementary file 1 [file efa5795ada85e84d326bedac.xlsx]

## Sheet: Table S1
Table S1. The summary of the database of rice canopy image and corresponding yield
Exp. ID	Category	Country	Name of location	Latitude (Expressed in degree decima)	Longtitude (Expressed in degree decima)	Type (1: on-station, 2: on-farm, researcher managed field; 3: on-farm, farmer managed field)	Production system (IR: irrigated, RL: rainfed lowland, RU: rainfed upland)	Season (1: wet, 2: dry, 3: summer)	Crop establishment method (1: transplanted; 2: direct seeded; 3: unknown)	Treatment remarks	N-P2O5-K2O chemical fertilizer application rate (kg ha-1)	Variety name	Harvesting year and month	Number of harvesting plots	Harvesting area (m2)	camera type	Observation	Remarks
1001	model	Côte d'Ivoire	M'be	7.87N	5.11W	1	IR	1	1	Variety trial	104-48-36	46 varieties	Nov to Dec-19	83	0.96	RICOH WG-40
1002	model	Côte d'Ivoire	M'be	7.87N	5.11W	1	IR	1	1	Seed production plot	80-30-30	ARICA 3	2019-12-01	100	0.96	RICOH WG-40
1003	model	Côte d'Ivoire	M'be	7.87N	5.11W	1	IR	1	1	Seed production plot	80-30-30	Bouake Ameliore	2020-01-01	100	0.96	RICOH WG-40
1004	model	Côte d'Ivoire	M'be	7.87N	5.11W	1	IR	1	1	Seed production plot	80-30-30	CY2	2019-12-01	100	0.96	RICOH WG-40
1005	model	Côte d'Ivoire	M'be	7.87N	5.11W	1	IR	1	1	Seed production plot	80-30-30	IR 841	2020-01-01	100	0.96	RICOH WG-40
1006	model	Côte d'Ivoire	M'be	7.87N	5.11W	1	IR	1	1	Seed production plot	80-30-30	JT11	2020-01-01	100	0.96	RICOH WG-40
1007	model	Côte d'Ivoire	M'be	7.87N	5.11W	1	IR	1	1	Seed production plot	93-48-36	NERICA L-19	2019-12-01	100	0.96	RICOH WG-40
1101	prediction	Tanzania	Moshi	3.45S	37.38E	1	IR	1	1	Variety by water management trial	200-0-0	NERICA 1, IR 64, TXD306	Oct to Nov-19	36	1.8	RICOH WG-4
1201	model	Kenya	Mwea	0.65S	37.37E	1	IR	1	1	Variety by fertilizer trial	0-25-25	Basmati370	Dec-19 to Jan-20	9	1.2	Nikon D5300
											75-25-25 (3plits)		Dec-19 to Jan-20	6	1.2
1301	model	Côte d'Ivoire	M'be	7.87N	5.11W	1	IR	2	1	Variety trial	104-48-36	40 varieties; before harvesting, photos were taken for 6 varieties only (MINGHUI 63, GSR IR2-9-R1-SU3-Y2, IR10F360, Moroberekan, Sambha Mahsuri + Sub1, Manaw Thukha)	May to June-20	64	0.96	RICOH WG-40		2d before harvest, 1d before harvest, harvest
1302	model	Cote d`Ivoire	M`be	7.87N	5.11W	1	IR	2	1	Variety trial	70-48-36	245 varieties	2020-06-01	281	0.96	RICOH WG-40
1303	model	Côte d'Ivoire	M'be	7.87N	5.11W	1	IR	2	1	Variety trial	104-48-36	Sahel 108, AR051H, WITA 9, AR708H, AR606H	2020-06-01	8	0.96	RICOH WG-40		Hybrid evaluation
1305	model	Côte d'Ivoire	M'be	7.87N	5.11W	1	IR	2	1	Seed production plot	93-48-36	NERICA L-19	2020-05-01	20	0.96	RICOH WG-40
1306	model	Côte d'Ivoire	M'be	7.87N	5.11W	1	IR	2	1	Variety trial	200-68-120	IR 64, IR1055-14-1-1	2020-05-01	30	0.96	RICOH WG-40
1307	model	Côte d'Ivoire	M'be	7.87N	5.11W	1	IR	2	1	Seed production plot	80-30-30	NERICA 4	2020-04-01	100	0.96	RICOH WG-40
1308	model	Côte d'Ivoire	M'be	7.87N	5.11W	1	IR	2	1	Seed production plot	93-48-36	NERICA L-19	2020-06-01	100	0.96	RICOH WG-40
1311	model	Côte d'Ivoire	M'be	7.87N	5.11W	1	IR	2	1	Unreplicated fertilizer trial	0-25-70	IR 64	2020-04-01	20	0.96	RICOH WG-40
1312	model	Côte d'Ivoire	M'be	7.87N	5.11W	1	IR	2	1	Seed production plot	93-48-36	IR 64	2020-05-01	30	0.96	RICOH WG-40
1313	model	Côte d'Ivoire	M'be	7.87N	5.11W	1	IR	2	1	Unreplicated fertilizer trial	160-25-70	IR 64	2020-04-01	20	0.96	RICOH WG-40
1314	model	Côte d'Ivoire	M'be	7.87N	5.11W	1	IR	2	1	Unreplicated fertilizer trial	0-0-0	IR 64	2020-04-01	20	0.96	RICOH WG-40
1315	model	Côte d'Ivoire	M'be	7.87N	5.11W	1	IR	2	1	Seed production plot	80-30-30	Orylux 6	2020-04-01	100	0.96	RICOH WG-40
1316	model	Côte d'Ivoire	M'be	7.87N	5.11W	1	IR	2	1	Seed production plot	93-48-36	Sahel 108	2020-05-01	30	0.96	RICOH WG-40
1317	model	Cote d`Ivoire	M`be	7.85N	5.11W	1	RU	2	1	Cropping system x fertilizer trial	102-43-43	NERICA 4	2020-07-01	24	0.96	RICOH WG-40
										Cropping system x fertilizer trial	0-0-0		2020-07-01	30	0.96
1318	model	Cote d`Ivoire	M'be	7.88N	5.10W	3	IR	2	2	Farmer plot	84-33-33	JT11	2020-08-20	15	0.96	RICOH WG-40		M`be Farmer (N`guessan Loukou Anderson)
1319	model	Cote d`Ivoire	M'be	7.88N	5.10W	3	IR	2	2	Farmer plot	88-36-27	WITA 9	2020-08-20	35	0.96	RICOH WG-40		M`be Farmer (Kouassi Kouakou Emmanuel)
1320	model	Cote d`Ivoire	M'be	7.88N	5.10W	3	IR	2	1	Farmer plot	81-32-32	ORYLUX 6	2020-09-20	15	0.96	RICOH WG-40		M`be Farmer (KOUADIO Kouadio Nestor)
1321	model	Cote d`Ivoire	M'be	7.88N	5.10W	3	IR	2	2	Farmer plot	93-23-23	WITA 9	2020-08-20	15	0.96	RICOH WG-40		M`be Farmer (N’guessan Koffi François)
1322	model	Cote d`Ivoire	M'be	7.88N	5.10W	3	IR	2	2	Farmer plot	84-33-33	C26	2020-08-20	20	0.96	RICOH WG-40		M`be Farmer (BROU Kouakou)
1323	model	Cote d`Ivoire	M'be	7.88N	5.10W	3	IR	2	2	Farmer plot	88-35-35	Orylux 6	2020-09-20	10	0.96	RICOH WG-40		M`be Farmer (ATRO Kouassi Désiré)
1324	model	Cote d`Ivoire	M'be	7.88N	5.10W	3	IR	2	2	Farmer plot	55-22-22	JT 11	2020-10-20	52	0.96	RICOH WG-40		M`be Farmer (KOUAKOU KONAN HERVE)
1325	model	Cote d`Ivoire	M'be	7.88N	5.10W	3	IR	2	2	Farmer plot	49-34-25	WITA 9	2020-10-20	45	0.96	RICOH WG-40		Francis (Farmer)
1401	model	Madagascar	Behenjy	19.19S	47.49E	2	IR	1	1	Fertilizer management x TP date x TP density trial in two fields (see sheet 3 for more detailed info)	0-0-0	X265	Apr-19 to May-19	24	2.56	Canon PowerShot SX610 HS		Pictures were taken 1-30 days before harvest
											80-0-0		Apr-19 to May-19	24	2.56			Pictures were taken 1-30 days before harvest
1402	model	Madagascar	Marovoay	16.02S to 16.34S	46.18E to 46.21E	3	IR	2	1	Farmer's fields	0-0-0 to 28.5-25.2-9.64	Kelimalanga, Maviamizaha, Rakorintsana, Taya, Tiliara, Tovolahy reboka, Tsiresindrano (X398), Xfaneva, Xrapida, X360, 0N332	2020-09-20	55	1	Canon PowerShot SX620 HS
1403	model	Madagascar	Ambohibary	19.60S to 19.62S	47.18E to 47.19E	2	IR	1	1	Multi-locational micro-nutrient omission trials	0-0-0	X265	2020-06-01	8	7.2	Canon PowerShot SX620 HS	Severe cold stress and severe cold sterility of spikelets
											160-68.7-84.3		2020-06-01	7	7.2
											160-68.7-84.3+MgSZnBCu		2020-06-01	8	7.2
											160-68.7-84.3+ZnBCu		2020-06-01	8	7.2
											160-68.7-84.3+SZnBCu		2020-06-01	8	7.2
											160-68.7-84.3+MgSBCu		2020-06-01	8	7.2
											160-68.7-84.3+MgSZnCu		2020-06-01	8	7.2
											160-68.7-84.3+MgSZnB		2020-06-01	8	7.2
1501	model	Nigeria	Ibadan	7.49N	3.91E	1	IR	2	1	Variety trial	200-100-100	55 varieties	May-20 to Jun-20	110	1	FUJIFILM FinePix f550exr		Yield evaluation of breeding lines (AYT)
1601	continuous	Japan	Kyoto	35.2N	135.47E	1	IR	3	1	Variety trial	60-100-100	Koshihikari	Sept-20	1	1.08	HykeCam SP2, Olympus TG-5		Continuous image
	panicle													10				Panicle cut experiment
1602	model	Japan	Kyoto	35.2N	135.47E	1	IR	3	1	Variety trial	60-100-100	Takanari	Sept-20	1	1.08	HykeCam SP2, Olympus TG-5		Continuous image x3 augmented
	model													7				Panicle cut experiment
1603	model	Japan	Kyoto	35.2N	135.47E	1	IR	3	1	No fertilizer farmers' plot	0-0-0	Shin-Habutaemochi, Akinouta, Beniasahi	2021-09-20	15	3	Olympus TG-6		Farmers' field
1701	model	Senegal	Fanaye	16.53N	15.18W	1	IR	2	1	Variety by fertilizer trial	120-60-60	Sahel 108_qRL_1, Sahel 108_qRL-2, Sahel 108, ISRIZ09	2020-06-22	32	0.96	RICOH WG-40
											180-119-120
1702	model	Senegal	Ndiaye	16.18N	16.25W	1	IR	2	1	Variety by fertilizer trial	120-60-60	Sahel 108_qRL_1, Sahel 108_qRL-2, Sahel 108, ISRIZ09	2020-06-01	32	0.96	RICOH WG-40		Hybrid, inbred varieties
											180-119-120
1703	model	Senegal	Ndiaye	16.18N	16.25W	1	IR	2	1	Multi-sowing trial	120-60-60	Sahel 108	2020-06-01	16	0.96	RICOH WG-40
1704	model	Senegal	Fanaye	16.53N	15.18W	1	IR	2	1	Cropping system trial	120-60-60	Sahel 108	2020-07-16	86	0.96	RICOH WG-40
1705	model	Senegal	Fanaye	16.53N	15.18W	1	IR	2	1	Variety trial	120-60-60	64 varieties	2020-07-25	128	2.56	RICOH WG-40
1706	model	Senegal	Ndiaye	16.18N	16.25W	1	IR	2	1	Variety trial	120-60-60	54 varieties	2020-07-25	104	2.56	RICOH WG-40
1707	model	Senegal	Fanaye	16.18N	16.25W	1	IR	2	1	Long-term trial	120-60-60	Sahel 108	2020-06-29	4	0.96	RICOH WG-40
											120-119-120			4	0.96
											180-60-60			4	0.96
											60-60-60			4	0.96
1708	model	Senegal	Ndiaye	16.18N	16.25W	1	IR	2	1	Long-term trial	120-60-60	Sahel 108	2020-06-29	4	0.96	RICOH WG-40
											120-119-120			4	0.96
											180-60-60			4	0.96
											60-60-60			4	0.96
1709	model	Senegal	Fanaye	16.53N	15.18W	1	IR	2	1	Variety trial	120-60-60	IR1055-14-1-1, IR 64	2020-06-22	6	1.08	RICOH WG-40
1710	model	Senegal	Ndiaye	16.18N	16.25W	1	IR	2	1	Perennial rice trial	120-60-60	PR101, PR107, PR25, PR23, PR24, Sahel 108	2020-07-21	53	0.96	RICOH WG-40
1711	model	Senegal	Ndiaye	16.18N	16.25W	1	IR	2	1	Variety x nutrient x crop establishment trial in non-salinity field	120-60	Sahel 108, Sahel 108_Saltol, ISRIZ10	2020-06-26	42	0.96	RICOH WG-40
											120-60-120
											120-60-120+100 gypsum+10 Zn
1712	model	Senegal	Ndiaye	16.18N	16.25W	1	IR	2	1	Variety x nutrient x crop establishment trial in alinity field	120-60	Sahel 108, Sahel 108_Saltol, ISRIZ10	2020-07-20	42	0.96	RICOH WG-40
											120-60-120
											120-60-120+100 gypsum+10 Zn
1713	model	Senegal	Fanaye	16.53N	15.18W		IR	2	1	Seed production	150-60-60	NERICA L-19	2020-07-25	20	1.08	RICOH WG-40
1714	model	Senegal	Fanaye	16.53N	15.18W	1	IR	2	1	Seed production	150-60-60	NERICA 4	2020-07-22	20	1.08	RICOH WG-40
1715	model	Senegal	Ndiaye	16.18N	16.25W	1	IR	2	1	Seed production	150-60-60	NERICA 4	2020-06-01	20	1.08	RICOH WG-40
1716	model	Senegal	Ndiaye	16.18N	16.25W	1	IR	2	1	Seed production	150-60-60	NERICA 8	2020-06-01	20	1.08	RICOH WG-40
1717	model	Senegal	Ndiaye	16.18N	16.25W	1	IR	2	1	Seed production	150-60-60	NERICA 14	2020-06-29	20	1.08	RICOH WG-40
1718	model	Senegal	Fanaye	16.53N	15.18W	1	IR	2	1	Seed production	150-60-60	Sahel 108	2020-07-25	20	1.08	RICOH WG-40
1719	model	Senegal	Ndiaye	16.18N	16.25W	1	IR	2	1	Seed production	150-60-60	Sahel 134	2020-06-01	20	1.08	RICOH WG-40
1720	model	Senegal	Fanaye	16.53N	15.18W	1	IR	2	1	Seed production	150-60-60	Sahel 177	2020-07-15	20	1.08	RICOH WG-40
1721	model	Senegal	Fanaye	16.53N	15.18W	1	IR	2	1	Seed production	150-60-60	Sahel 210	2020-07-09	20	1.08	RICOH WG-40
1722	model	Senegal	Ndiaye	16.18N	16.25W	1	IR	2	1	Seed production	150-60-60	Sahel 210	2020-06-01	20	1.08	RICOH WG-40
1901	model	Japan	Akiem Kaizu	35.22N	136.67E	3	IR	3	1	Strip fertilizer trial	125-27-27	Hoshijirushi	2020-09-20	22	0.8496	Olympus TG-6		Gifu_akie
1902	model	Japan	Kire, Motosu	35.55N	136.62E	3	IR	3	1	ICT irrigation	45-30-30	Koshihikari	2020-08-20	4	1.176	Olympus TG-6		Gifu_kire
1903	model	Japan	Shimoike, Kaizu	35.25N	136.59E	3	IR	3	1	ICT irrigation	55-55-55	Koshihikari	2020-09-20	4	0.9075	Olympus TG-6		Gifu_shimoike, Severe lodging is removed
1904	model	Japan	Kabuchi, Hichiso	35.60N	137.09E	3	IR	3	1	Unreplicated fertilizer trial	60-30-30	Koshihikari	2020-09-20	13	1.098	Olympus TG-6		Gifu_gero_kabuchi
1905	model	Japan	Kanayama, Gero	35.64N	137.11E	3	IR	3	1	Unreplicated fertilizer trial	96-36-36	Koshihikari	2020-09-20	26	1.0472	Olympus TG-6		Gifu_gero_sasabora
1906	model	Japan	Yoro, Yoro	35.26N	136.59E	3	IR	3	1	Strip fertilizer trial	96-36-36	Hoshijirushi	2020-09-20	32	0.936	Olympus TG-6		Gifu_yoro
2004	model	Cote d`Ivoire	M`be	7.87N	5.11W	1	IR	1	1	Unreplicated fertilizer trial	160-25-70	IR 64	2020-10-20	30	1.08	RICOH WG-40
	angle													5				Image taken from various depression angles
2005	model	Cote d`Ivoire	M`be	7.87N	5.11W	1	IR	1	1	Unreplicated fertilizer trial	0-0-0	IR 64	2020-10-21	30	1.08	RICOH WG-40
	angle													5				Image taken from various depression angles
2006	model	Cote d`Ivoire	M`be	7.87N	5.11W	1	IR	1	1	Unreplicated fertilizer trial	320-25-70	IR 64	2020-10-22	30	1.08	RICOH WG-40
	angle													5				Image taken from various depression angles
2007	model	Cote d`Ivoire	M`be	7.87N	5.11W	1	IR	1	1	Unreplicated fertilizer trial	0-25-70	IR 64	2020-10-23	30	1.08	RICOH WG-40
	angle													5				Image taken from various depression angles
2008	model	Cote d`Ivoire	M`be	7.87N	5.11W	1	IR	1	1	Seed production plot	93-48-36	IR 64	2020-10-24	25	1.08	RICOH WG-40
	angle													5				Image taken from various depression angles
2009	model	Cote d`Ivoire	M`be	7.85N	5.11W	1	RU	1	1	Cropping system x fertilizer trial	102-43-43 for F1	NERICA 4	2020-10-20	82	1.08	RICOH WG-40
										Cropping system x fertilizer trial	0-0-0 for F0		2020-10-20	93	1.08	RICOH WG-40
2010	model	Cote d`Ivoire	M`be	7.85N	5.11W	1	RU	1	1	Cropping system trial	102-43-43 for F1	NERICA 4	2020-10-20	95	1.08	RICOH WG-40
2011	model	Cote d`Ivoire	M`be	7.87N	5.11W	1	IR	1	1	Variety trial	104-48-36	22 Varieties	2021-10-20	34	0.96			2d before harvest, 1d before harvest in morning, noon, and afternoon
	continuous																	1wk, 2wk, 3wk, 4wk after heading, harvest
2013	model	Cote d`Ivoire	M`be	7.87N	5.11W	1	IR	1	1	Variety trial	70-48-36	220 Varieties	2021-11-20	256	0.96	RICOH WG-40
2014	model	Cote d`Ivoire	M`be	7.87N	5.12W	3	IR	1	1	Farmer plot	108-53-53	JT11	2021-01-01	52	0.96	RICOH WG-40		AKA (M`be farmer)
2016	model	Cote d`Ivoire	M`be	7.81N	5.08W	3	IR	1	1	Farmer plot	80-30-30	WITA 9	2020-12-01	40	0.96	RICOH WG-40		Arsene (M`be farmer)
2017	model	Cote d`Ivoire	Mbe	7.87N	5.11W	1	IR	1	1	Seed production	104-48-36	IR 64	2020-11-01	35	0.96	RICOH WG-40		ANTENNA Border
2018	model	Cote d`Ivoire	Mbe	7.87N	5.11W	1	IR	1	1	Seed production	104-48-36	Sahel 108	2020-11-01	75	0.96	RICOH WG-40		ANTENNA Border
2101	model	Japan	Tsukuba	36.03N	140.04E	1	IR	3	1	variety trial	48-64-32	IR 64, YP16-37, YP16-40, YP16-44	2020-09-30	15	1.62	Olympus TG-6
2102	model	Japan	Tsukuba	36.03N	140.04E	1	IR	3	1	Variety trial	48-64-32	YP16-37	2020-09-28	9	1.62	Olympus TG-6		Panicle cut experiment
2201	model	Japan	Ishigaki	24.38N	124.20E	1	IR	3	1	Variety trial	94-40-40	IR 64, YTH183, YP5, NIL5	2020-06-01	12	1.296	SONY a6000
2301	model	Japan	Ishigaki	24.38N	124.20E	1	IR	3	1	Variety trial	85-40-40	IR 64, YP5, NIL5, NIL8, YTH183, Hitomebore	2020-11-01	18	0.648	Olympus TG-6
	continuous																	Countinous image
2401	Prediction	Japan	Tokyo	35.41N	139.29E	1	IR	3	1	N fertilzier x crop establishment trial	0 or 40-100-100	Koshihikari, Takanari	Sep-20 to Oct-20	11	1.08	ORYMPUS TG-5		N treatment (with or without N) and 3 transplanting dates
2501	model	Japan	Sendai	38.22N	140.98E	3	IR	3	1	Farmer plot	46-60-76, 48-80-56	Manamusume, Hitomebore	2020-09-01	28	0.817	Olympus TG-5		+Weeds biomass, +drone images
2502	model	Japan	Sendai	38.22N	140.98E	3	IR	3	2	Farmer plot	152-60-92	Manamusume	2020-09-01	8	0.817	Olympus TG-5		+Weeds biomass, +drone images
2601	model	Senegal	Ndiaye	16.18N	16.25W	1	IR	1	1	Variety by fertilizer trial	120-60-60	Sahel 108_qRL_1, Sahel 108_qRL-2, Sahel 108, ISRIZ09	2020-11-01	32	0.96	RICOH WG-40		Hybrid, inbred varieties
											180-119-120
2602	model	Senegal	Ndiaye	16.18N	16.25W	1	IR	1	1	Variety x nutrient x crop establishment trial in non-salinity field	120-60	Sahel 108, Sahel 108_Saltol, ISRIZ 10	2020-11-01	42	0.96	RICOH WG-40
											120-60-120
											120-60-120+100 gypsum+10 Zn
2603	model	Senegal	Ndiaye	16.18N	16.25W	1	IR	1	1	Variety x nutrient x crop establishment trial in salinity field	120-60	Sahel 108, Sahel 108_Saltol, ISRIZ 10	2020-11-01	38	0.96	RICOH WG-40
											120-60-120
											120-60-120+100 gypsum+10 Zn
2604	model	Senegal	Ndiaye	16.18N	16.25W	1	IR	1	1	Multi-sowing trial	120-60-60	Sahel 108	2020-10-01	20	0.96	RICOH WG-40
2605	model	Senegal	Ndiaye	16.18N	16.25W	1	IR	1	1	Perennial rice trial	120-60-60	PR101, PR107, PR25, PR23, PR24, Sahel 108	2020-10-01	36	0.96	RICOH WG-40
2606	model	Senegal	Ndiaye	16.18N	16.25W	1	IR	1	1	Long-term trial	0-0-0	Sahel 108	2020-12-01	4	0.96	RICOH WG-40
											120-60-60			4	0.96	RICOH WG-40
											120-119-120			3	0.96	RICOH WG-40
											120-0-0			3	0.96	RICOH WG-40
											180-60-60			4	0.96	RICOH WG-40
											60-60-60			4	0.96	RICOH WG-40
2607	model	Senegal	Ndiaye	16.18N	16.25W	1	IR	1	1	Variety trial	120-60-60	70 varieties (see sheet 2)	2020-11-01	139	2.56	RICOH WG-40
2608	model	Senegal	Ndiaye	16.18N	16.25W	1	IR	1	1	Seed production	150-60-60	NERICA 4	2020-12-01	20	1.08	RICOH WG-40
2609	model	Senegal	Ndiaye	16.18N	16.25W	1	IR	1	1	Seed production	150-60-60	NERICA 8	2020-12-01	20	1.08	RICOH WG-40
2610	model	Senegal	Ndiaye	16.18N	16.25W	1	IR	1	1	Seed production	150-60-60	Sahel 108	2020-12-01	20	1.08	RICOH WG-40
2611	model	Senegal	Ndiaye	16.18N	16.25W	1	IR	1	1	Seed production	150-60-60	Sahel 134	2020-12-01	20	1.08	RICOH WG-40
2612	model	Senegal	Ndiaye	16.18N	16.25W	1	IR	1	1	Seed production	150-60-60	Sahel 210	2020-12-01	20	1.08	RICOH WG-40
2613	model	Senegal	Fanaye	16.53N	15.18W	1	IR	1	1	Variety by fertilizer trial	120-60-60	Sahel 108_qRL_1, Sahel 108_qRL-2, Sahel 108, ISRIZ09	2020-11-01	32	0.96	RICOH WG-40
											180-119-120					RICOH WG-40
2614	model	Senegal	Fanaye	16.53N	15.18W	1	IR	1	1	Long-term trial	0-0-0	Sahel 108	2020-11-01	4	0.96	RICOH WG-40
											120-60-60			4	0.96	RICOH WG-40
											120-119-120			4	0.96	RICOH WG-40
											120-0-0			4	0.96	RICOH WG-40
											180-60-60			4	0.96	RICOH WG-40
											60-60-60			4	0.96	RICOH WG-40
2615	model	Senegal	Fanaye	16.53N	15.18W	1	IR	1	1	Variety trial	120-60-60	67 varieties	2020-12-01	133	2.56	RICOH WG-40
2616	model	Senegal	Fanaye	16.53N	15.18W	1	IR	1	1	Seed production	150-60-60	Sahel 108	2020-12-01	20	1.08	RICOH WG-40
2617	model	Senegal	Fanaye	16.53N	15.18W	1	IR	1	1	Seed production	150-60-60	Sahel 177	2020-12-01	20	1.08	RICOH WG-40
2618	model	Senegal	Fanaye	16.53N	15.18W	1	IR	1	1	Seed production	150-60-60	Sahel 210	2020-12-01	20	1.08	RICOH WG-40
2619	model	Senegal	Fanaye	16.53N	15.18W	1	IR	1	1	Seed production	150-60-60	NERICA 1	2020-12-01	20	1.08	RICOH WG-40
2620	model	Senegal	Fanaye	16.53N	15.18W	1	IR	1	1	Seed production	150-60-61	NERICA 4	2020-12-01	20	1.08	RICOH WG-40
2621	model	Senegal	Fanaye	16.53N	15.18W	1	IR	1	1	Seed production	150-60-62	NERICA 6	2020-12-01	20	1.08	RICOH WG-40
2622	model	Senegal	Fanaye	16.53N	15.18W	1	IR	1	1	Seed production	150-60-63	NERICA L-19	2020-12-01	20	1.08	RICOH WG-40
2623	model	Senegal	Fanaye	16.53N	15.18W	1	IR	1	1	Seed production	150-60-64	Orylux 6	2020-12-01	20	1.08	RICOH WG-40
2701	continuous	Madagascar	Marovoay	16.17S	46.68E	2	IR	2	1	qEMF (early morning flowering) x Water management	90-120-87	IR 64, IR 64_qEMF	2020-11-01	7	5.76	RICOH WG-50, 70
